# Supplementary material for: Comparative genomics reveals that a fish pathogenic bacterium Edwardsiella tarda has acquired the locus of enterocyte effacement (LEE) through horizontal gene transfer
Source: PubMed Central journal article supplement (PMC3890536; doi:10.1186/1471-2164-14-642), 2013-09-22

**Figure S2****E22**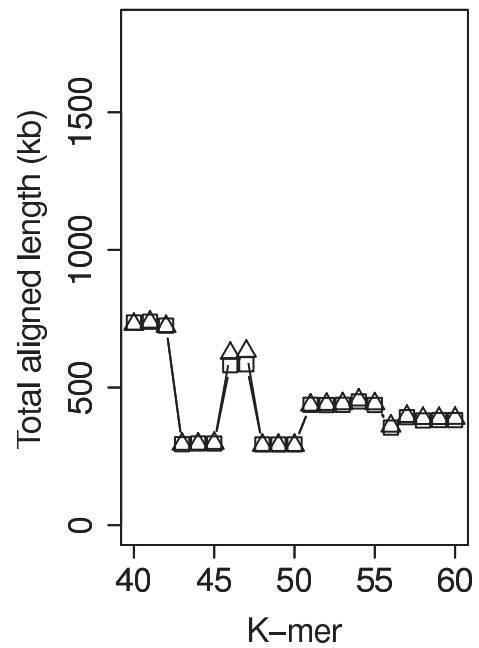**FPC503**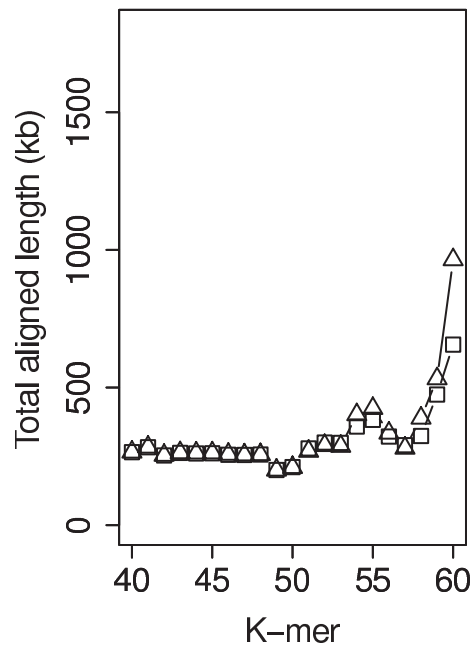**NUF806**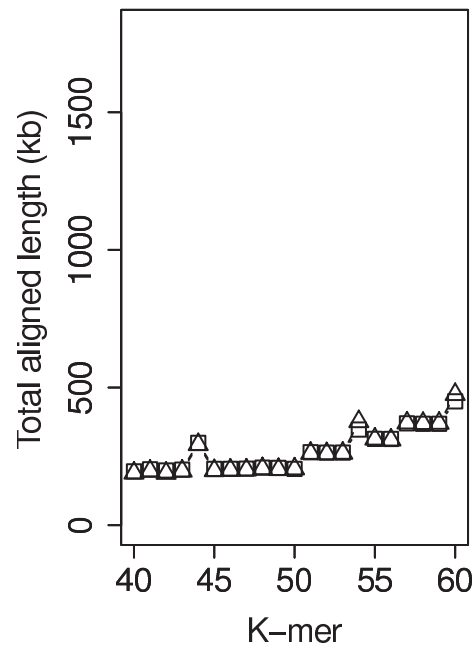**SU100**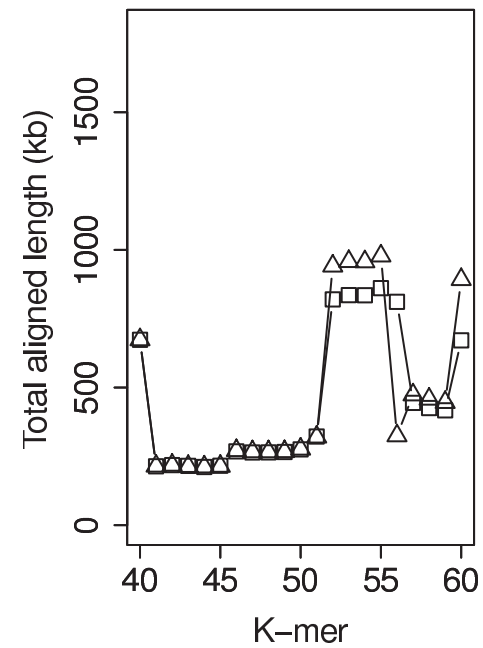**SU117**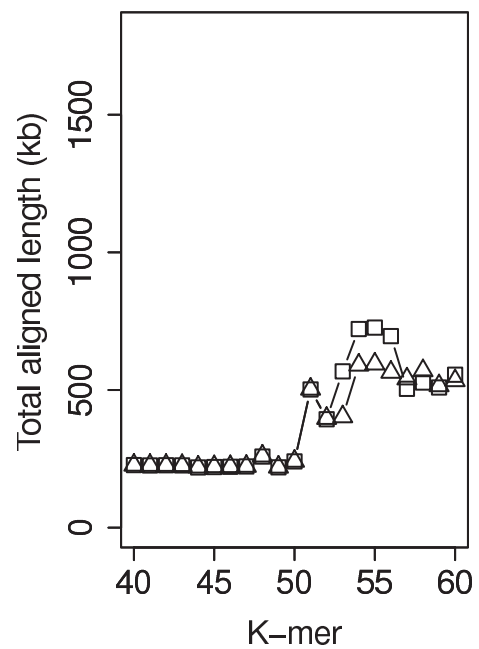**SU138**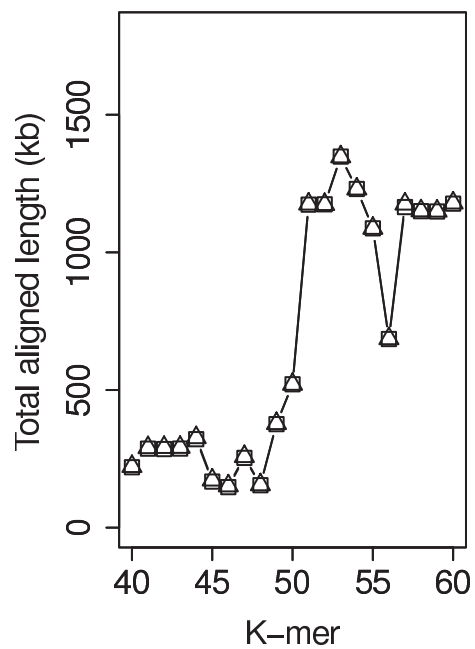**SU244**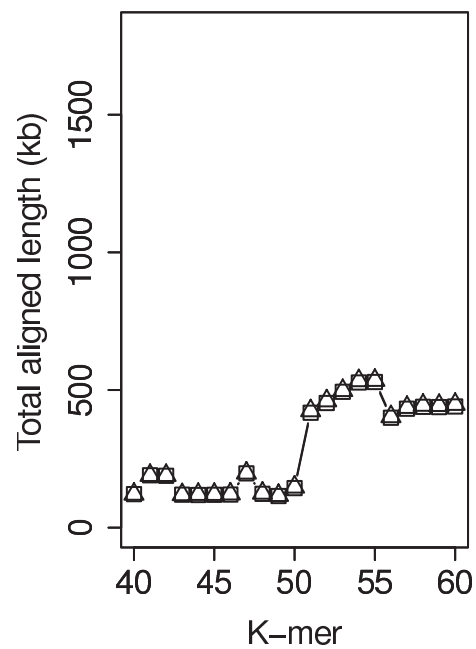**ATCC23685**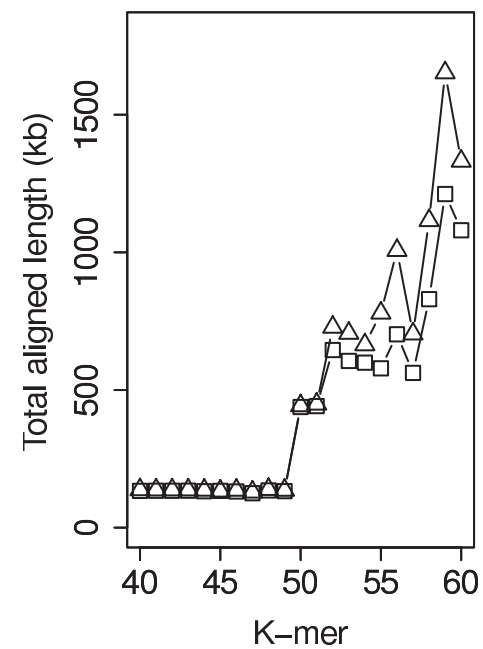

Supplement: 1471-2164-14-642-S2.pdf [file 1471-2164-14-642-S2.pdf]
