# Supplementary material for: Comparative genomics reveals that a fish pathogenic bacterium Edwardsiella tarda has acquired the locus of enterocyte effacement (LEE) through horizontal gene transfer
Source: PubMed Central journal article supplement (PMC3890536; doi:10.1186/1471-2164-14-642), 2013-09-22

Figure S6

Four contigs of *E. tarda* E22  
vs. plasmid pRA1

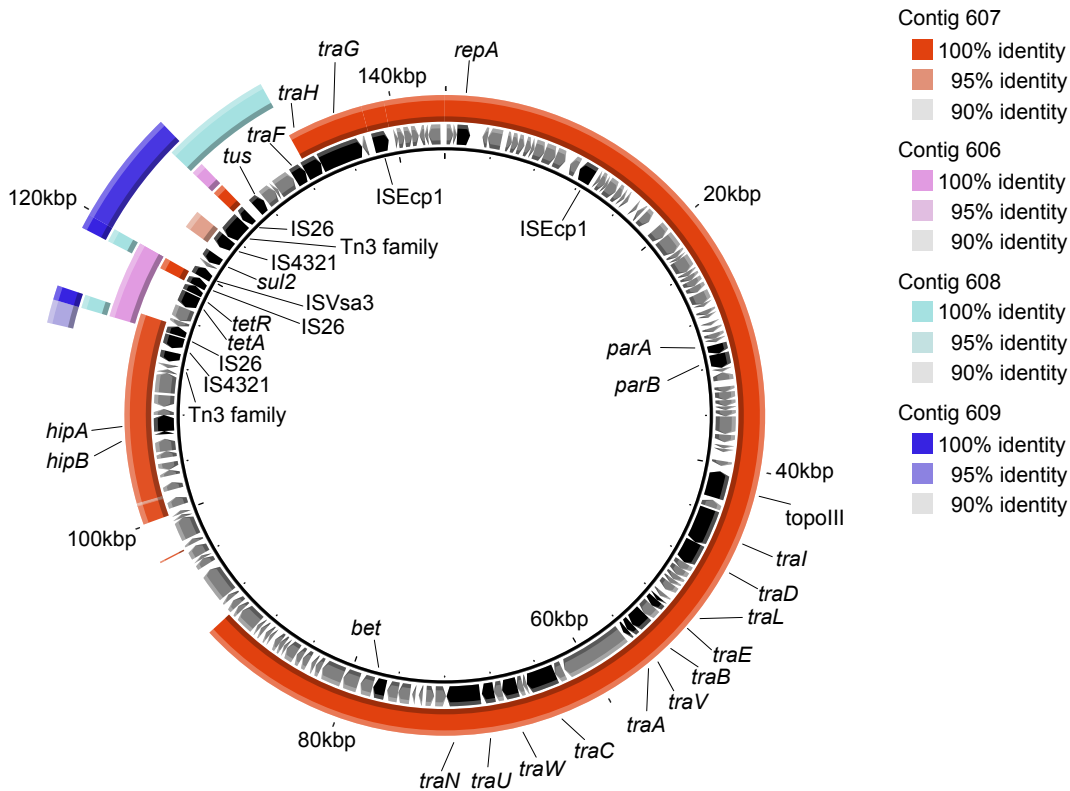

Supplement: 1471-2164-14-642-S9.pdf [file 1471-2164-14-642-S9.pdf]
